# Supplementary material for: Prevalence of Cannabis Withdrawal Symptoms Among People With Regular or Dependent Use of Cannabinoids: A Systematic Review and Meta-analysis
Source: PubMed Central journal article supplement (PMC7146100; doi:10.1001/jamanetworkopen.2020.2370), 2020-04-09
Supplement: jamanetwopen-3-e202370-s001.pdf [file jamanetwopen-3-e202370-s001.pdf]

## Supplementary Online Content

Bahji A, Stephenson C, Tyo R, Hawken ER, Seitz DP. Prevalence of cannabis withdrawal symptoms among people with regular or dependent use of cannabinoids: a systematic review and meta-analysis. *JAMA Netw Open*. 2020;3(4):e202370. doi:10.1001/jamanetworkopen.2020.2370

**eTable 1.** Full Systematic Review Search Strategy

**eTable 2.** Study Characteristics

**eTable 3.** List of Validated Cannabis Withdrawal Instruments and Scales

**eFigure 1.** Subgroup Analyses and Meta-Regressions

**eFigure 2.** Publication Bias Analysis Using Funnel Plot for Prevalence of Cannabis Withdrawal Syndrome Against Standard Error

**eTable 3.** Quality Assessment Using Newcastle Ottawa Scale

### **eReferences**

This supplementary material has been provided by the authors to give readers additional information about their work.

eTable 1. Full Systematic Review Search Strategy

***EMBASE: inception to June 15, 2019***

| Order | Search                                                                                                                                                                                                                                                                                           | Hits   |
|-------|--------------------------------------------------------------------------------------------------------------------------------------------------------------------------------------------------------------------------------------------------------------------------------------------------|--------|
| 1.    | exp "Cannabis (genus)"/ or cannabis.mp. or exp "cannabis use"/ or exp cannabis smoking/ or exp Cannabis sativa/ or exp "Cannabis sativa subsp. indica"/ or exp medical cannabis/ or exp cannabis addiction/ or exp cannabis/ or exp "Cannabis sativa subsp. sativa"/ or exp cannabis derivative/ | 47677  |
| 2.    | marijuana.mp.                                                                                                                                                                                                                                                                                    | 16748  |
| 3.    | 1 or 2                                                                                                                                                                                                                                                                                           | 50463  |
| 4.    | exp withdrawal syndrome/ or cannabis withdrawal.mp.                                                                                                                                                                                                                                              | 34063  |
| 5.    | exp drug withdrawal/ or exp withdrawal syndrome/ or withdrawal.mp.                                                                                                                                                                                                                               | 313158 |
| 6.    | 4 or 5                                                                                                                                                                                                                                                                                           | 313158 |
| 7.    | prevalence.mp. or exp prevalence/                                                                                                                                                                                                                                                                | 988826 |
| 8.    | 3 and 6 and 7                                                                                                                                                                                                                                                                                    | 239    |

***MEDLINE: inception to June 15, 2019***

| Order | Search                                                        | Hits  |
|-------|---------------------------------------------------------------|-------|
| 1.    | cannabis.mp. or exp Cannabis/                                 | 19938 |
| 2.    | marijuana.mp.                                                 | 18422 |
| 3.    | cannabinoid.mp. or exp Cannabinoids/ or exp Endocannabinoids/ | 24887 |
| 4.    | hashish.mp.                                                   | 576   |
| 5.    | exp "Marijuana Use"/ or exp Marijuana Abuse/                  | 9816  |
| 6.    | 1 or 2 or 3 or 4 or 5                                         | 47925 |
| 7.    | withdrawal.mp. or exp Substance Withdrawal Syndrome/          | 94691 |
| 8.    | cannabis withdrawal syndrome.mp.                              | 42    |
| 9.    | 7 or 8                                                        | 94691 |

|    |                                   |        |
|----|-----------------------------------|--------|
| 10 | exp Prevalence/ or prevalence.mp. | 654209 |
| 11 | 6 and 9 and 10                    | 78     |

***PsycINFO: inception to June 15, 2019***

| Order | Search                                                        | Hits  |
|-------|---------------------------------------------------------------|-------|
| 1.    | exp "Cannabis Use Disorder"/ or exp Cannabis/ or cannabis.mp. | 13157 |
| 2.    | marijuana.mp. or exp Marijuana/ or exp Marijuana Usage/       | 11014 |
| 3.    | cannabinoid.mp. or exp Cannabinoids/                          | 5971  |
| 4.    | exp Hashish/ or hashish.mp.                                   | 397   |
| 5.    | nabilone.mp.                                                  | 76    |
| 6.    | exp Tetrahydrocannabinol/ or synthetic cannabinoids.mp.       | 1659  |
| 7.    | weed.mp.                                                      | 232   |
| 8.    | 1 or 2 or 3 or 4 or 5 or 6 or 7                               | 23957 |
| 9.    | exp Drug Withdrawal/ or cannabis withdrawal.mp.               | 7911  |
| 10    | withdrawal syndrome.mp.                                       | 1637  |
| 11    | marijuana withdrawal.mp.                                      | 93    |
| 12    | 9 or 10 or 11                                                 | 8457  |
| 13    | 8 and 12                                                      | 461   |

***Web of Science: inception to June 15, 2019***

| Order | Search              | Hits    |
|-------|---------------------|---------|
| 1.    | TOPIC: (cannabis)   | 21,176  |
| 2.    | TOPIC: (withdrawal) | 103,958 |
| 3.    | TOPIC: (prevalence) | 785,316 |
| 4.    | 1 and 2 and 3       | 93      |

***Allied and Complementary Medicine: inception to June 15, 2019***

| Order | Search                            | Hits |
|-------|-----------------------------------|------|
| 1.    | Cannabis/ or cannabis.mp.         | 260  |
| 2.    | marijuana.mp.                     | 92   |
| 3.    | Cannabinoids/ or cannabinoids.mp. | 89   |
| 4.    | 1 or 2 or 3                       | 319  |
| 5.    | withdrawal.mp.                    | 721  |
| 6.    | cannabis withdrawal.mp.           | 1    |
| 7.    | 5 or 6                            | 721  |
| 8.    | 4 and 7                           | 4    |

***CINAHL and Pre-CINAHL: inception to June 15, 2019***

| Order | Search                                                    | Hits   |
|-------|-----------------------------------------------------------|--------|
| 1.    | (MH "Cannabis") OR "cannabis" OR (MH "Medical Marijuana") | 11,360 |
| 2.    | (MH "Substance Withdrawal Syndrome") OR "withdrawal"      | 16,343 |
| 3.    | S1 AND S2                                                 | 293    |

***ProQuest Dissertations & Theses: inception to June 15, 2019***

| Order | Search                                        | Hits  |
|-------|-----------------------------------------------|-------|
| 1.    | (cannabis withdrawal syndrome) AND prevalence | 3,094 |

***Psychiatry Online: inception to June 15, 2019***

| Order | Search                       | Hits |
|-------|------------------------------|------|
| 1.    | cannabis withdrawal syndrome | 209  |

eTable 2. Study Characteristics

| Psych | TS  | Demographic | CUD_% | Male_% | Age  | White_% | Black_% | Hispanic_% | Asian_% | Daily_MJ_% | Timeline  | N    | CWS_n | CWS_% | Threshold_Sx | Quality |
|-------|-----|-------------|-------|--------|------|---------|---------|------------|---------|------------|-----------|------|-------|-------|--------------|---------|
| No    | No  | Adults      | 12.2  | 62     | 30.8 | 76      | 0       | 19         | 7       | 100        | Past Year | 1603 | 128   | 8.0   | 2            | Fair    |
| Yes   | Yes | Adults      | 81.7  | 77     | 41.5 | 31      | 69      | 0          | 0       | 53         | Past Year | 120  | 60    | 50.0  | 6            | Poor    |
| Yes   | Yes | Adults      | 100   | 80     | 28.6 | 97      | 0       |            |         | 62         | Lifetime  | 39   | 36    | 92.3  | 4            | Fair    |
| No    | Yes | Adults      | 100   | 87     | 31.2 | 98      | 0       | 0          | 0       | 100        | Lifetime  | 62   | 47    | 75.8  | 1            | Fair    |
| No    | Yes | Adults      | 54    | 85     | 33.8 | 100     | 0       | 0          | 0       | 81         | Lifetime  | 54   | 31    | 57.4  | 3            | Poor    |
| No    | Yes | Adults      | 100   | 61     | 30.9 | 94      | 6       | 0          | 0       | 100        | Lifetime  | 18   | 14    | 77.8  | 4            | Fair    |
| Yes   | No  | Adults      | 100   | 82.6   | 27.4 | 100     | 0       | 0          | 0       | 100        | Past Year | 23   | 7     | 30.4  | 3            | Poor    |
| Yes   | No  | C&A         | 60.7  | 67     | 16.8 | 90      | 5       | 2.5        | 2.5     | 45.3       | Past Year | 214  | 79    | 36.9  | 2            | Fair    |
| No    | No  | Adults      | 54    | 78     | 35   | 52      | 0       | 0          | 0       | 80         | Past Year | 104  | 46    | 44.2  | 4            | Poor    |
| Yes   | Yes | Mixed       | 100   | 54     | 20.3 | 71      | 23      |            | 1       | 49         | Past Year | 170  | 74    | 43.5  | 4            | Fair    |
| No    | No  | Adults      | 8     | 57     | 37   | 53      | 36      | 6          | 6       | 64         | Past Year | 102  | 16    | 15.7  | 3            | Fair    |
| Yes   | Yes | C&A         | 78.6  | 72     | 15.8 | 48      | 12      | 41         | 0       | 71         | Lifetime  | 229  | 153   | 66.8  | 1            | Fair    |
| Yes   | No  | Mixed       | 53.4  | 93     | 19.2 | 22      | 26      | 35         | 0       | 78         | Past Year | 110  | 53    | 48.2  | 1            | Fair    |
| No    | No  | Adults      | 11.7  | 50     | 24.8 | 100     | 0       | 0          | 0       |            | Past Year | 1568 | 458   | 29.2  | 1            | Fair    |
| No    | No  | Adults      | 16.4  | 65     | 23.9 | 100     | 0       | 0          | 0       | 100        | Past Year | 359  | 45    | 12.5  | 1            | Fair    |
| Yes   | Yes | Adults      | 100   | 75     | 28.7 | 100     | 0       | 0          | 0       | 100        | Lifetime  | 92   | 78    | 84.8  | 1            | Fair    |
| No    | No  | Adults      | 13.9  | 38     | 48.4 | 29      | 71      | 0          | 0       | 100        | Past Year | 818  | 135   | 16.5  | 3            | Good    |
| No    | No  | Adults      | 92.4  | 58.3   | 29.2 | 0       | 82      | 6          | 0       | 66         | Past Year | 384  | 157   | 40.9  | 3            | Fair    |
| Yes   | No  | C&A         | 84.4  | 82     | 16.6 | 86      | 0       | 0          | 0       | 100        | Past Year | 90   | 36    | 40.0  | 1            | Fair    |
| No    | No  | Adults      | 57.2  | 67     | 58.5 | 75      | 11      | 7          | 2       | 57         | Past Year | 2613 | 899   | 34.4  | 3            | Fair    |
| No    | Yes | Adults      | 77.9  | 73     | 33.3 | 10      | 85      | 5          | 0       | 100        | Past Year | 136  | 69    | 50.7  | 6            | Fair    |
| No    | Yes | Adults      | 100   | 80     | 32.3 | 89      | 11      | 0          | 0       | 84         | Past Year | 160  | 82    | 51.3  | 4            | Fair    |
| No    | Yes | Adults      | 100   | 87     | 42.5 | 85      | 15      | 0          | 0       | 100        | Lifetime  | 30   | 18    | 60.0  | 3            | Good    |
| No    | Yes | Adults      | 79.3  | 100    | 28.5 | 14      | 86      | 0          | 0       | 100        | Lifetime  | 30   | 22    | 73.3  | 1            | Poor    |
| Yes   | Yes | Mixed       | 100   | 74     | 34.3 | 42      | 24      | 29         | 2       | 42         | Lifetime  | 42   | 29    | 69.0  | 1            | Fair    |
| No    | No  | Adults      | 91    | 58     | 31.2 | 20      | 80      | 0          | 0       | 100        | Past Year | 469  | 199   | 42.4  | 6            | Poor    |

|     |     |        |      |      |      |      |      |      |     |      |           |      |            |       |   |      |
|-----|-----|--------|------|------|------|------|------|------|-----|------|-----------|------|------------|-------|---|------|
| Yes | No  | Adults | 24.6 | 66   |      | 59   |      |      |     |      | Past Year | 1527 | <b>185</b> | 12.1  | 3 | Fair |
| Yes | No  | Adults | 26.7 | 90.1 | 39   |      |      |      |     | 30.1 | Past Year | 278  | <b>21</b>  | 7.6   | 3 | Fair |
| Yes | Yes | Adults | 100  | 63   | 31   | 66   | 0    | 0    | 34  | 98   | Lifetime  | 47   | <b>41</b>  | 87.2  | 1 | Poor |
| No  | No  | Adults | 48   | 49   | 22   | 100  | 0    | 0    | 0   | 100  | Past Year | 416  | <b>208</b> | 50.0  | 1 | Fair |
| No  | Yes | Adults | 63   | 49   | 22   | 100  | 0    | 0    | 0   | 100  | Lifetime  | 278  | <b>189</b> | 68.0  | 1 | Fair |
| Yes | Yes | C&A    | 100  | 67   | 17   | 100  | 0    | 0    | 0   | 100  | Lifetime  | 21   | <b>21</b>  | 100.0 | 1 | Fair |
| No  | No  | Mixed  | 3.5  |      | 19   | 100  | 0    | 0    | 0   | 2.9  | Past Year | 732  | <b>118</b> | 16.1  | 4 | Fair |
| No  | Yes | Adults | 1.8  | 53.6 | 45.1 | 86.7 | 10.7 | 8    | 8   | 87.2 | Past Year | 801  | <b>419</b> | 52.3  | 1 | Poor |
| No  | Yes | Mixed  | 100  | 85   | 19.6 | 100  | 0    | 0    | 0   | 100  | Lifetime  | 118  | <b>85</b>  | 72.0  | 3 | Fair |
| Yes | No  | Adults | 30   | 66.1 | 32   | 76   |      |      |     |      | Past Year | 596  | <b>238</b> | 39.9  | 2 | Poor |
| No  | Yes | Adults | 100  | 72   | 30.3 | 64   | 28   | 0    | 0   | 100  | Past Year | 302  | <b>152</b> | 50.3  | 1 | Fair |
| No  | No  | Adults |      | 68   | 34.3 |      |      |      |     |      | Past Year | 1712 | <b>322</b> | 18.8  | 2 | Fair |
| No  | No  | Adults |      | 68   | 34.3 |      |      |      |     |      | Past Year | 1187 | <b>116</b> | 9.8   | 2 | Fair |
| No  | Yes | C&A    | 76.9 | 100  | 16.4 | 45   | 22   | 27   | 5   | 51   | Lifetime  | 93   | <b>62</b>  | 66.7  | 1 | Fair |
| No  | Yes | Adults | 100  | 68.4 | 36.1 | 69.3 | 12.2 | 17.3 | 1.1 | 100  | Lifetime  | 450  | <b>349</b> | 77.6  | 1 | Fair |
| No  | No  | Adults | 57   | 58   | 36   |      |      |      |     |      | Past Year | 243  | <b>49</b>  | 20.2  | 1 | Poor |
| No  | No  | Adults | 92   | 53.7 | 30   |      |      |      |     |      | Past Year | 162  | <b>52</b>  | 32.1  | 1 | Fair |
| No  | No  | Adults | 20.8 |      |      |      |      |      |     |      | Past Year | 722  | <b>213</b> | 29.5  | 1 | Fair |
| No  | Yes | C&A    | 56.9 | 90   | 16.2 | 89   | 11   | 0    | 0   | 100  | Past Year | 72   | <b>42</b>  | 58.3  | 4 | Fair |
| No  | Yes | Adults | 100  | 50   | 28.2 | 100  | 0    | 0    | 0   | 100  | Lifetime  | 12   | <b>12</b>  | 100.0 | 1 | Fair |
| No  | No  | Adults | 23.6 | 39   | 31.9 | 100  | 0    | 0    | 0   | 14   | Past Year | 2276 | <b>270</b> | 11.9  | 3 | Fair |
| No  | Yes | Adults | 79.1 | 69.8 | 37   |      |      |      |     |      | Lifetime  | 43   | <b>28</b>  | 65.1  | 2 | Poor |
| No  | Yes | Adults | 100  | 71.4 | 27   |      |      |      |     |      | Lifetime  | 56   | <b>36</b>  | 64.3  | 2 | Poor |
| Yes | No  | Adults | 50.4 | 63   | 32.3 | 72   | 19   | 6    | 0   | 16   | Past Year | 1735 | <b>270</b> | 15.6  | 2 | Fair |

**eTable 3.** List of Validated Cannabis Withdrawal Instruments and Scales

| <b>Instrument</b>                                                       | <b>Type</b>            |
|-------------------------------------------------------------------------|------------------------|
| Addiction Severity Index <sup>1</sup>                                   | Clinician Administered |
| Cannabis Use Disorder and Associated Disabilities Schedule <sup>2</sup> | Clinician Administered |
| Customary Drinking and Drug Use Record <sup>3</sup>                     | Clinician Administered |
| Composite International Diagnostic Interview <sup>4</sup>               | Clinician Administered |
| Circumstances, Motivation, Readiness for Treatment Scale <sup>4</sup>   | Clinician Administered |
| Cannabis Use Disorders Identification Test <sup>5</sup>                 | Clinician Administered |
| Cannabis Withdrawal Scale <sup>6</sup>                                  | Clinician Administered |
| Marijuana Problem Inventory <sup>7</sup>                                | Clinician Administered |
| Structured Clinical Interview for DSM <sup>8</sup>                      | Clinician Administered |
| Daily Marijuana Questionnaire <sup>9,10</sup>                           | Self-reported          |
| Inventory of Drug Use Consequences <sup>11</sup>                        | Self-reported          |
| Marijuana Craving Questionnaire <sup>12</sup>                           | Self-reported          |
| Marijuana Quit Questionnaire <sup>13</sup>                              | Self-reported          |
| Marijuana Motives Measure <sup>14</sup>                                 | Self-reported          |
| Marijuana Problem Scale <sup>15</sup>                                   | Self-reported          |
| Marijuana Withdrawal Symptom Checklist <sup>16</sup>                    | Self-reported          |
| Symptom Checklist-90 revised <sup>17</sup>                              | Self-reported          |
| Time-Line-Follow-Back <sup>18</sup>                                     | Self-reported          |

eFigure 1. Subgroup analyses and meta-regressions

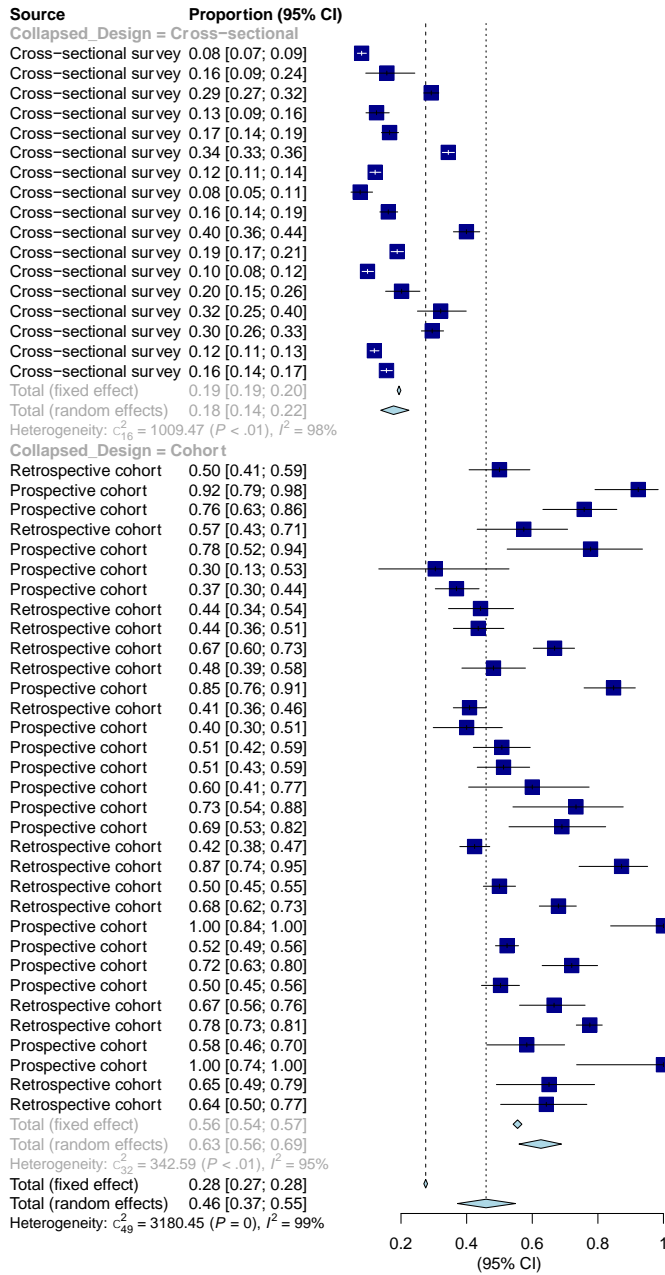

Forest Plot for Prevalence of Cannabis Withdrawal in People With Cannabis Use Disorder  
Stratified by Study Design



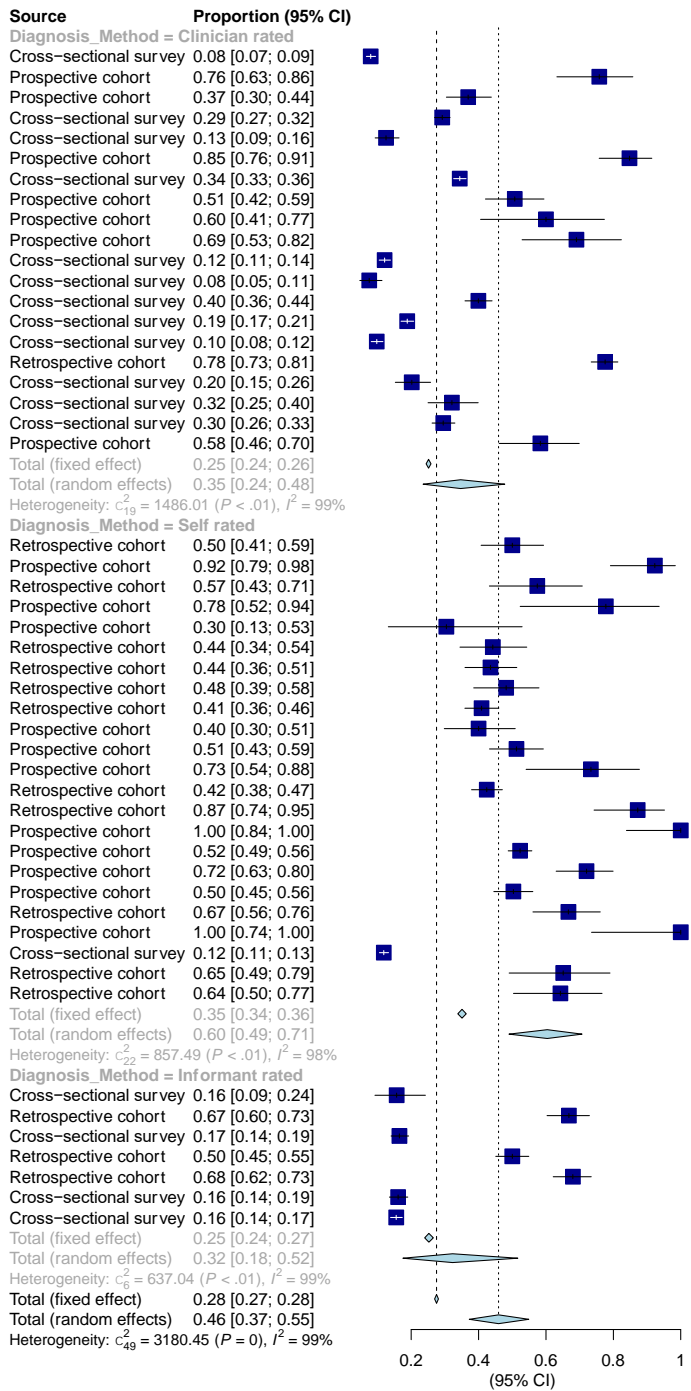

Forest Plot for Prevalence of Cannabis Withdrawal in People With Cannabis Use Disorder Stratified by Method of Cannabis Withdrawal Diagnosis

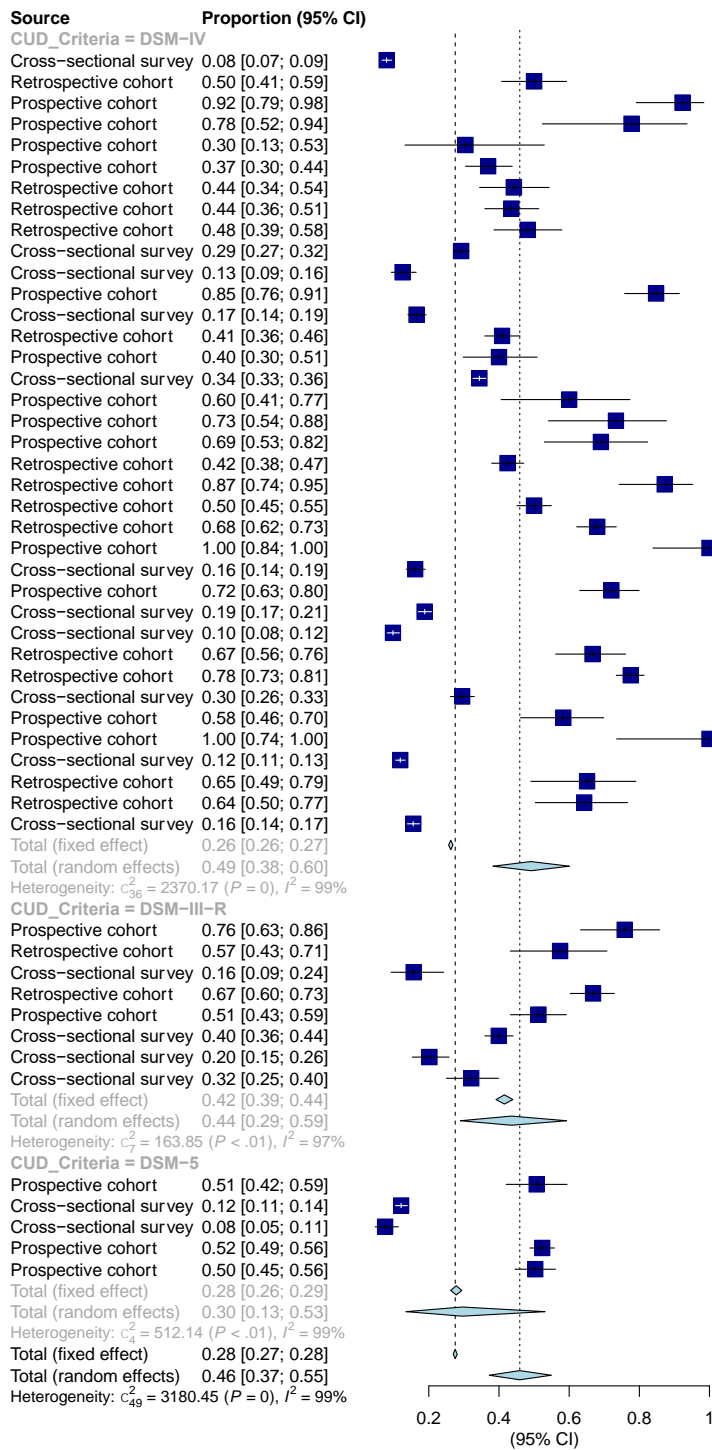

Forest Plot for Prevalence of Cannabis Withdrawal in People With Cannabis Use Disorder  
Stratified by Method of Cannabis Use Disorder Diagnosis

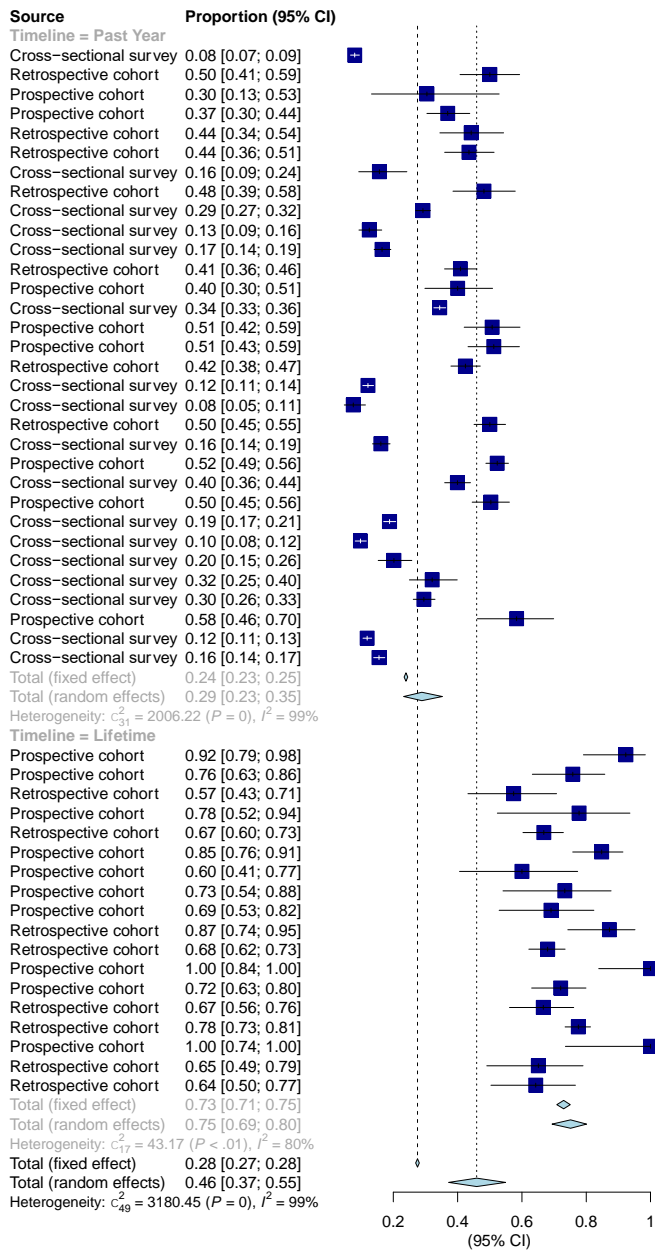

Forest Plot for Prevalence of Cannabis Withdrawal in People With Cannabis Use Disorder Stratified by Timeline of Cannabis Withdrawal

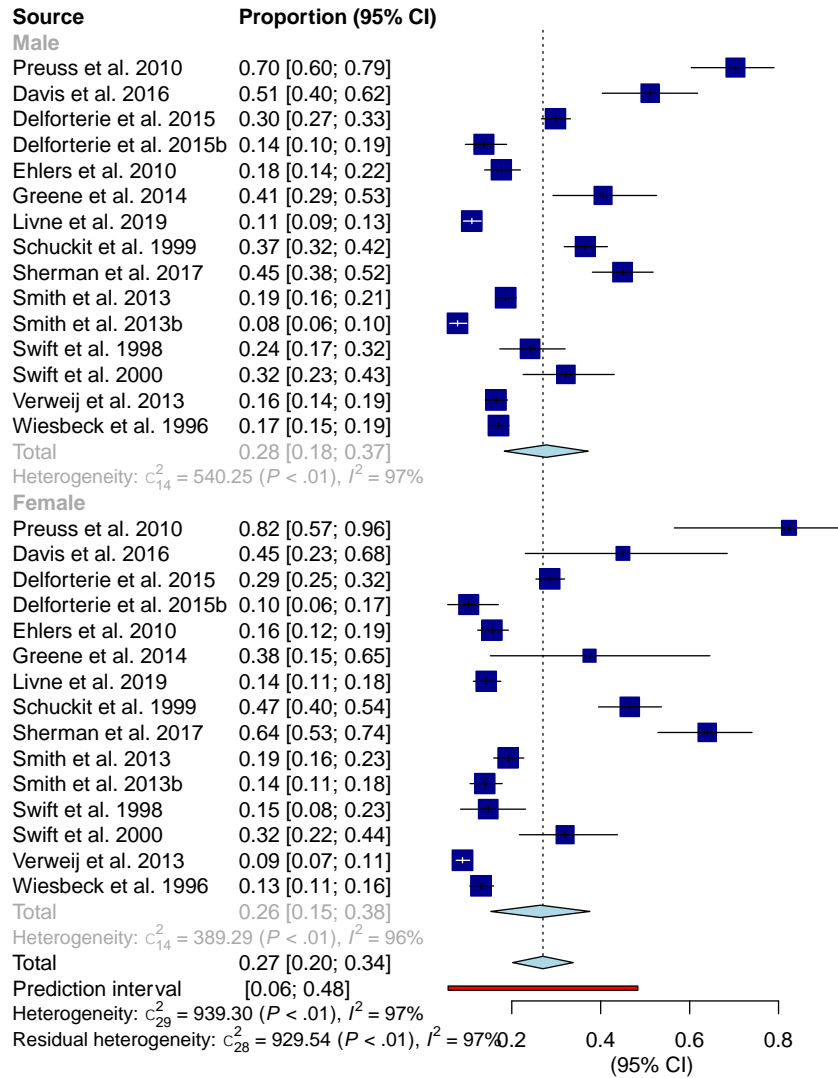

Forest Plot for Prevalence of Cannabis Withdrawal reported by studies with male and female subgroups

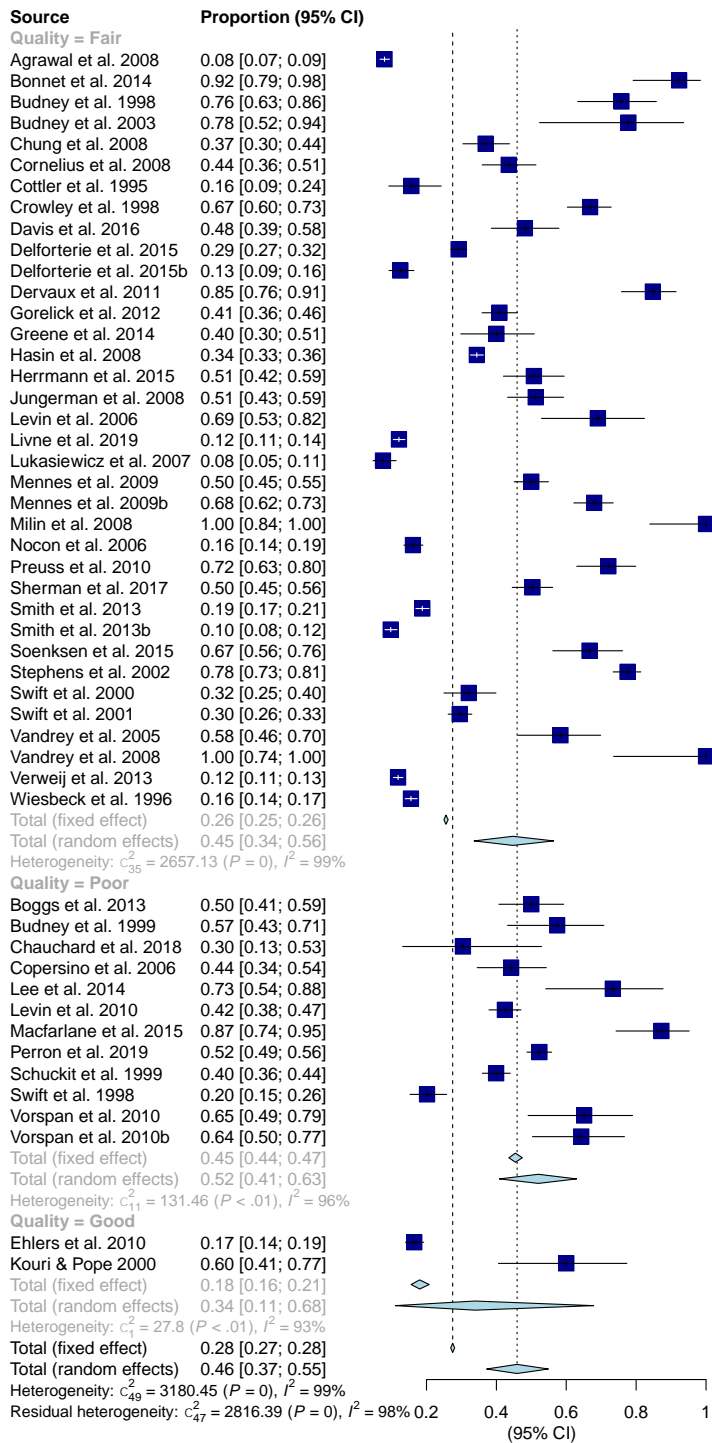

Forest Plot for Prevalence of Cannabis Withdrawal reported by studies by subgroups for quality of study (as per Newcastle Ottawa Scale): no subgroup differences detected.

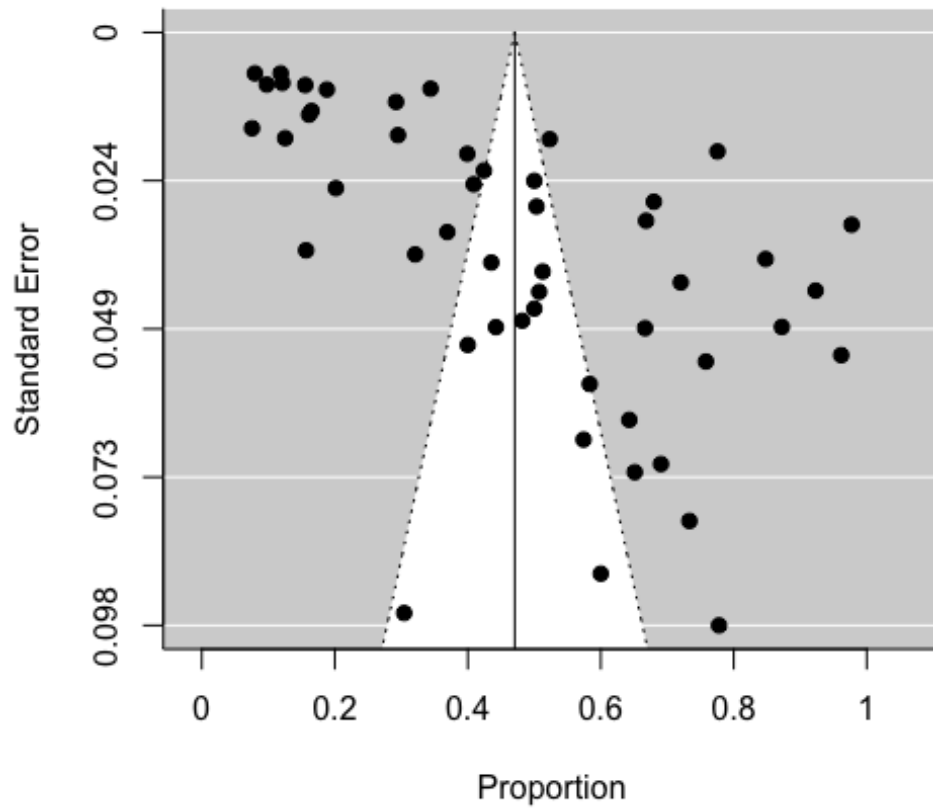

eFigure 2. Publication bias analysis using funnel plot for prevalence of cannabis withdrawal syndrome against standard error

eTable 3. Quality Assessment Using Newcastle Ottawa Scale

| Article                                       | Representation | Selection | Exposure | Outcome | Comparability | Assessment | Follow-up | Attrition | Overall |
|-----------------------------------------------|----------------|-----------|----------|---------|---------------|------------|-----------|-----------|---------|
| <i>Agrawal et al. 2008</i> <sup>19</sup>      | *              | *         | *        |         | *             |            |           |           | Fair    |
| <i>Boggs et al. 2013</i> <sup>20</sup>        |                |           |          |         |               |            |           |           | Poor    |
| <i>Bonnet et al. 2014</i> <sup>21</sup>       |                |           | *        |         |               | *          |           | *         | Fair    |
| <i>Budney et al. 1998</i> <sup>22</sup>       |                |           | *        |         | *             |            |           |           | Fair    |
| <i>Budney et al. 1999</i> <sup>16</sup>       |                |           |          |         |               |            |           |           | Poor    |
| <i>Budney et al. 2003</i> <sup>23</sup>       |                | *         |          |         | *             |            | *         |           | Fair    |
| <i>Chauchard et al. 2018</i> <sup>24</sup>    |                |           | *        |         |               |            |           |           | Poor    |
| <i>Chung et al. 2008</i> <sup>25</sup>        |                |           | *        |         |               |            | *         | *         | Fair    |
| <i>Copersino et al. 2006</i> <sup>26</sup>    |                |           | *        |         |               |            |           |           | Poor    |
| <i>Cornelius et al. 2008</i> <sup>27</sup>    | *              |           | *        |         | *             | *          |           |           | Fair    |
| <i>Cottler et al. 1995</i> <sup>28</sup>      | *              |           | *        |         |               |            |           |           | Fair    |
| <i>Crowley et al. 1998</i> <sup>29</sup>      |                |           | *        |         | *             |            |           |           | Fair    |
| <i>Davis et al. 2016</i> <sup>30</sup>        | *              |           | *        |         | *             |            | *         |           | Fair    |
| <i>Delforterie et al. 2015</i> <sup>31</sup>  | *              |           | *        |         |               |            |           |           | Fair    |
| <i>Delforterie et al. 2015b</i> <sup>31</sup> | *              |           | *        |         |               |            |           |           | Fair    |
| <i>Dervaux et al. 2011</i> <sup>32</sup>      |                |           | *        |         | *             |            |           |           | Fair    |
| <i>Ehlers et al. 2010</i> <sup>33</sup>       | *              | *         | *        |         | *             | *          |           | *         | Good    |
| <i>Gorelick et al. 2012</i> <sup>34</sup>     |                |           | *        |         | *             |            | *         |           | Fair    |
| <i>Greene et al. 2014</i> <sup>35</sup>       |                |           |          |         | *             | *          |           |           | Fair    |
| <i>Hasin et al. 2008</i> <sup>36</sup>        | *              |           | *        |         | *             | *          |           |           | Fair    |
| <i>Herrmann et al. 2015</i> <sup>37</sup>     |                |           | *        |         | *             |            |           |           | Fair    |
| <i>Jungerman et al. 2008</i> <sup>38</sup>    |                |           | *        |         | *             |            |           |           | Fair    |
| <i>Kouri &amp; Pope 2000</i> <sup>39</sup>    | *              | *         |          | *       | *             |            | *         | *         | Good    |
| <i>Lee et al. 2014</i> <sup>40</sup>          |                |           |          |         | *             |            |           |           | Poor    |
| <i>Levin et al. 2006</i> <sup>41</sup>        |                |           | *        |         | *             |            |           |           | Fair    |
| <i>Levin et al. 2010</i> <sup>13</sup>        |                |           |          |         | *             |            |           |           | Poor    |
| <i>Livne et al. 2019</i> <sup>42</sup>        | *              |           | *        |         |               |            |           |           | Fair    |

|                                              |   |   |   |   |   |   |   |   |             |
|----------------------------------------------|---|---|---|---|---|---|---|---|-------------|
| <i>Lukasiewicz et al. 2007</i> <sup>43</sup> |   |   | * |   |   | * |   |   | <i>Fair</i> |
| <i>Macfarlane et al. 2015</i> <sup>44</sup>  |   |   | * |   |   |   |   |   | <i>Poor</i> |
| <i>Mennes et al. 2009</i> <sup>45</sup>      | * |   | * |   | * | * |   |   | <i>Fair</i> |
| <i>Mennes et al. 2009b</i> <sup>45</sup>     | * |   |   |   | * | * |   |   | <i>Fair</i> |
| <i>Milin et al. 2008</i> <sup>46</sup>       |   |   | * |   | * |   | * |   | <i>Fair</i> |
| <i>Nocon et al. 2006</i> <sup>47</sup>       | * |   | * |   |   |   | * | * | <i>Fair</i> |
| <i>Perron et al. 2019</i> <sup>48</sup>      |   |   |   |   |   |   |   |   | <i>Poor</i> |
| <i>Preuss et al. 2010</i> <sup>49</sup>      |   |   |   |   | * |   |   | * | <i>Fair</i> |
| <i>Schuckit et al. 1999</i> <sup>50</sup>    |   |   |   |   | * |   |   |   | <i>Poor</i> |
| <i>Sherman et al. 2017</i> <sup>51</sup>     |   |   | * |   | * |   |   |   | <i>Fair</i> |
| <i>Smith et al. 2013</i> <sup>52</sup>       | * |   | * |   |   | * |   |   | <i>Fair</i> |
| <i>Smith et al. 2013b</i> <sup>52</sup>      | * |   | * |   |   | * |   |   | <i>Fair</i> |
| <i>Soenksen et al. 2015</i> <sup>53</sup>    |   | * |   | * | * |   |   |   | <i>Fair</i> |
| <i>Stephens et al. 2002</i> <sup>54</sup>    |   | * | * |   |   | * | * |   | <i>Fair</i> |
| <i>Swift et al. 1998</i> <sup>55</sup>       |   |   | * |   |   |   |   |   | <i>Poor</i> |
| <i>Swift et al. 2000</i> <sup>56</sup>       |   |   | * |   |   |   | * | * | <i>Fair</i> |
| <i>Swift et al. 2001</i> <sup>57</sup>       | * |   | * |   |   |   |   |   | <i>Fair</i> |
| <i>Vandrey et al. 2005</i> <sup>9</sup>      |   |   | * |   | * |   |   |   | <i>Fair</i> |
| <i>Vandrey et al. 2008</i> <sup>58</sup>     |   |   | * | * | * |   | * |   | <i>Fair</i> |
| <i>Verweij et al. 2013</i> <sup>59</sup>     | * |   | * |   |   | * |   |   | <i>Fair</i> |
| <i>Vorspan et al. 2010</i> <sup>60</sup>     |   |   |   |   |   |   |   |   | <i>Poor</i> |
| <i>Vorspan et al. 2010b</i> <sup>60</sup>    |   |   |   |   |   |   |   |   | <i>Poor</i> |
| <i>Wiesbeck et al. 1996</i> <sup>61</sup>    | * | * | * |   |   | * |   |   | <i>Fair</i> |

*Studies that achieved a total rating of 6 points or higher were considered to be of the highest quality (“good”); studies that achieved a total rating of fewer than 2 points were considered to be of lowest quality (“poor”); and those between 2 and 5 points were rated as fair quality.*



## eReferences

1. McLellan AT, Kushner H, Metzger D, et al. The Fifth Edition of the Addiction Severity Index. *J Subst Abuse Treat* 1992;9(3):199–213.
2. Grant BF, Dawson DA, Stinson FS, et al. The Alcohol Use Disorder and Associated Disabilities Interview Schedule-IV (AUDADIS-IV): reliability of alcohol consumption, tobacco use, family history of depression and psychiatric diagnostic modules in a general population sample. *Drug Alcohol Depend* 2003;71(1):7–16.
3. Brown SA, Myers MG, Lippke L, et al. Psychometric evaluation of the Customary Drinking and Drug Use Record (CDDR): a measure of adolescent alcohol and drug involvement. *J Stud Alcohol* 1998;59(4):427–438.
4. Rubio-Stipec M, Bravo M, Canino G. [The Composite International Diagnostic Interview (CIDI): an epidemiologic instrument suitable for using in conjunction with different diagnostic systems in different cultures]. *Acta Psiquiatr Psicol Am Lat* 1991;37(3):191–204.
5. De Leon G, Melnick G, Kressel D, et al. Circumstances, motivation, readiness, and suitability (the CMRS scales): predicting retention in therapeutic community treatment. *Am J Drug Alcohol Abuse* 1994;20(4):495–515.
6. Allsop DJ, Norberg MM, Copeland J, et al. The Cannabis Withdrawal Scale development: patterns and predictors of cannabis withdrawal and distress. *Drug Alcohol Depend* 2011;119(1–2):123–129.
7. Knapp AA, Babbin SF, Budney AJ, et al. Psychometric assessment of the marijuana adolescent problem inventory. *Addict Behav* 2018;79:113–119.
8. First MB. Structured Clinical Interview for the DSM (SCID). In: *The Encyclopedia of Clinical Psychology*. American Cancer Society; p1–6.
9. Vandrey R., Budney A.J., Kamon J.L., et al. Cannabis withdrawal in adolescent treatment seekers. *Drug and Alcohol Dependence* 2005;78(2):205–210.
10. Dimeff LA. *Brief Alcohol Screening and Intervention for College Students (BASICS): A Harm Reduction Approach*. Guilford Press; 1999. 218 p.
11. Tonigan JS, Miller WR. The inventory of drug use consequences (InDUC): test-retest stability and sensitivity to detect change. *Psychol Addict Behav* 2002;16(2):165–168.
12. Heishman SJ, Singleton EG, Liguori A. Marijuana Craving Questionnaire: development and initial validation of a self-report instrument. *Addiction* 2001;96(7):1023–1034.
13. Levin KH, Copersino ML, Heishman SJ, et al. Cannabis Withdrawal Symptoms in Non-Treatment-Seeking Adult Cannabis Smokers. *Drug Alcohol Depend* 2010;111(1–2):120–127.

14. Lee CM, Neighbors C, Hendershot CS, et al. Development and Preliminary Validation of a Comprehensive Marijuana Motives Questionnaire. *J Stud Alcohol Drugs* 2009;70(2):279–287.
15. Hodgins DC, Stea JN. Psychometric evaluation of a lifetime version of the marijuana problems scale. *Addict Behav Rep* 2018;821–24.
16. Budney AJ, Novy PL, Hughes JR. Marijuana withdrawal among adults seeking treatment for marijuana dependence. *Addiction* 1999;94(9):1311–1322.
17. Derogatis LR, Unger R. Symptom Checklist-90-Revised. In: *The Corsini Encyclopedia of Psychology*. American Cancer Society; p1–2.
18. Sobell LC, Sobell MB. Timeline Follow-Back. In: Litten RZ, Allen JP, editors. *Measuring Alcohol Consumption: Psychosocial and Biochemical Methods*. Totowa, NJ: Humana Press; p41–72.
19. Agrawal A, Pergadia ML, Lynskey MT. Is There Evidence for Symptoms of Cannabis Withdrawal in the National Epidemiologic Survey of Alcohol and Related Conditions? *American Journal on Addictions* 2008;17(3):199–208.
20. Boggs DL., Kelly DL., Liu F., et al. Cannabis withdrawal in chronic cannabis users with schizophrenia. *Journal of psychiatric research* 2013;47(2):240–5.
21. Bonnet U, Specka M, Stratmann U, et al. Abstinence phenomena of chronic cannabis-addicts prospectively monitored during controlled inpatient detoxification: Cannabis withdrawal syndrome and its correlation with delta-9-tetrahydrocannabinol and -metabolites in serum. *Drug and Alcohol Dependence* 2014;143(Complete):189–197.
22. Budney AJ, Radonovich KJ, Higgins ST, et al. Adults seeking treatment for marijuana dependence: a comparison with cocaine-dependent treatment seekers. *Exp Clin Psychopharmacol* 1998;6(4):419–426.
23. Budney AJ, Moore BA, Vandrey RG, et al. The time course and significance of cannabis withdrawal. *J Abnorm Psychol* 2003;112(3):393–402.
24. Chauchard E, Hartwell KJ, McRae-Clark AL, et al. Cannabis Withdrawal in Adults With Attention-Deficit/Hyperactivity Disorder. *Prim Care Companion CNS Disord*;20(1):. Epub ahead of print February 22, 2018. DOI: 10.4088/PCC.17m02203.
25. Chung T, Martin CS, Cornelius JR, et al. Cannabis withdrawal predicts severity of cannabis involvement at 1-year follow-up among treated adolescents. *Addiction* 2008;103(5):787–799.
26. Copersino M.L., Boyd S.J., Tashkin D.P., et al. Cannabis withdrawal among non-treatment-seeking adult cannabis users. *American Journal on Addictions* 2006;15(1):8–14.

27. Cornelius JR, Chung T, Martin C, et al. Cannabis withdrawal is common among treatment-seeking adolescents with cannabis dependence and major depression, and is associated with rapid relapse to dependence. *Addict Behav* 2008;33(11):1500–1505.
28. Cottler LB, Schuckit MA, Helzer JE, et al. The DSM-IV field trial for substance use disorders: major results. *Drug and Alcohol Dependence* 1995;38(1):59–69.
29. Crowley T.J., Macdonald M.J., Whitmore E.A., et al. Cannabis dependence, withdrawal, and reinforcing effects among adolescents with conduct symptoms and substance use disorders. *Drug and Alcohol Dependence* 1998;50(1):27–37.
30. Davis JP, Smith DC, Morpew JW, et al. Cannabis Withdrawal, Posttreatment Abstinence, and Days to First Cannabis Use Among Emerging Adults in Substance Use Treatment: A Prospective Study. *J Drug Issues* 2016;46(1):64–83.
31. Delforterie M., Creemers H., Agrawal A., et al. Functioning of cannabis abuse and dependence criteria across two different countries: the United States and The Netherlands. *Substance use & misuse* 2015;50(2):242–250.
32. Dervaux A., Krebs M.O., Laqueille X. Anxiety and depressive symptoms or disorders in patients with cannabis dependence without major psychiatric disorders. *European Neuropsychopharmacology* 2011;21(SUPPL. 3):S578–S579.
33. Ehlers CL., Gizer IR., Vieten C., et al. Cannabis dependence in the San Francisco Family Study: age of onset of use, DSM-IV symptoms, withdrawal, and heritability. *Addictive behaviors* 2010;35(2):102–10.
34. Gorelick D.A., Levin K.H., Copersino M.L., et al. Diagnostic criteria for cannabis withdrawal syndrome. *Drug and Alcohol Dependence* 2012;123(1–3):141–147.
35. Greene M.C., Kelly J.F. The prevalence of cannabis withdrawal and its influence on adolescents' treatment response and outcomes: A 12-month prospective investigation. *Journal of Addiction Medicine* 2014;8(5):359–367.
36. Hasin D.S., Keyes K.M., Alderson D., et al. Cannabis withdrawal in the United States: Results from NESARC. *Journal of Clinical Psychiatry* 2008;69(9):1354–1363.
37. Herrmann ES, Weerts EM, Vandrey R. Sex differences in cannabis withdrawal symptoms among treatment-seeking cannabis users. *Exp Clin Psychopharmacol* 2015;23(6):415–421.
38. Jungerman FS., Laranjeira R. Characteristics of cannabis users seeking treatment in São Paulo, Brazil. *Revista panamericana de salud publica = Pan American journal of public health* 2008;23(6):384–93.
39. Kouri EM, Pope HG. Abstinence symptoms during withdrawal from chronic marijuana use. *Exp Clin Psychopharmacol* 2000;8(4):483–492.

40. Lee D., Schroeder J.R., Karschner E.L., et al. Cannabis withdrawal in chronic, frequent cannabis smokers during sustained abstinence within a closed residential environment. *American Journal on Addictions* 2014;23(3):234–242.
41. Levin FR., Brooks DJ., Bisaga A., et al. Severity of dependence and motivation for treatment: comparison of marijuana- and cocaine-dependent treatment seekers. *Journal of addictive diseases* 2006;25(1):33–41.
42. Livne O, Shmulewitz D, Lev-Ran S, et al. DSM-5 cannabis withdrawal syndrome: Demographic and clinical correlates in U.S. adults. *Drug and Alcohol Dependence* 2019;195:170–177.
43. Lukasiewicz M, Falissard B, Michel L, et al. Prevalence and factors associated with alcohol and drug-related disorders in prison: a French national study. *Substance abuse treatment, prevention, and policy* 2007;21.
44. Macfarlane V, Christie G. Synthetic cannabinoid withdrawal: A new demand on detoxification services. *Drug and Alcohol Review* 2015;34(2):147–153.
45. Mennes CE., Ben Abdallah A., Cottler LB. The reliability of self-reported cannabis abuse, dependence and withdrawal symptoms: multisite study of differences between general population and treatment groups. *Addictive behaviors* 2009;34(2):223–6.
46. Milin R, Manion I, Dare G, et al. Prospective Assessment of Cannabis Withdrawal in Adolescents With Cannabis Dependence: A Pilot Study. *Journal of the American Academy of Child & Adolescent Psychiatry* 2008;47(2):174–179.
47. Nocon A., Wittchen HU., Pfister H., et al. Dependence symptoms in young cannabis users? A prospective epidemiological study. *Journal of psychiatric research* 2006;40(5):394–403.
48. Perron BE, Holt KR, Yeagley E, et al. Mental health functioning and severity of cannabis withdrawal among medical cannabis users with chronic pain. *Drug Alcohol Depend* 2019;194:401–409.
49. Preuss UW., Watzke AB., Zimmermann J., et al. Cannabis withdrawal severity and short-term course among cannabis-dependent adolescent and young adult inpatients. *Drug and alcohol dependence* 2010;106(2–3):133–41.
50. Schuckit MA, Daepfen J-B, Danko GP, et al. Clinical Implications for Four Drugs of the DSM-IV Distinction Between Substance Dependence With and Without a Physiological Component. *AJP* 1999;156(1):41–49.
51. Sherman BJ, McRae-Clark AL, Baker NL, et al. Gender differences among treatment-seeking adults with cannabis use disorder: Clinical profiles of women and men enrolled in the achieving cannabis cessation-evaluating N-acetylcysteine treatment (ACCENT) study. *Am J Addict* 2017;26(2):136–144.

52. Smith P.H., Homish G.G., Leonard K.E., et al. Marijuana withdrawal and aggression among a representative sample of U.S. marijuana users. *Drug and Alcohol Dependence* 2013;132(1–2):63–68.
53. Soenksen S, Stein LAR, Brown JD, et al. Cannabis Withdrawal Among Detained Adolescents: Exploring the Impact of Nicotine and Race. *Journal of Child & Adolescent Substance Abuse* 2015;24(2):119–124.
54. Stephens RS, Babor TF, Kadden R, et al. The Marijuana Treatment Project: rationale, design and participant characteristics. *Addiction* 2002;97(s1):109–124.
55. Swift W, Hall W, Didcott P, et al. Patterns and correlates of cannabis dependence among long-term users in an Australian rural area. *Addiction* 1998;93(8):1149–1160.
56. Swift W, Hall W, Copeland J. One year follow-up of cannabis dependence among long-term users in Sydney, Australia. *Drug and Alcohol Dependence* 2000;59(3):309–318.
57. Swift W., Hall W., Teesson M. Characteristics of DSM-IV and ICD-10 cannabis dependence among Australian adults: Results from the National Survey of Mental Health and Wellbeing. *Drug and Alcohol Dependence* 2001;63(2):147–153.
58. Vandrey RG, Budney AJ, Hughes JR, et al. A within-subject comparison of withdrawal symptoms during abstinence from cannabis, tobacco, and both substances. *Drug and Alcohol Dependence* 2008;92(1–3):48–54.
59. Verweij K.J., Agrawal A., Nat N.O., et al. A genetic perspective on the proposed inclusion of cannabis withdrawal in DSM-5. *Psychological medicine* 2013;43(8):1713–1722.
60. Vorspan F, Guillem E, Bloch V, et al. Self-reported sleep disturbances during cannabis withdrawal in cannabis-dependent outpatients with and without opioid dependence. *Sleep Med* 2010;11(5):499–500.
61. Wiesbeck G.A., Schuckit M.A., Kalmijn J.A., et al. An evaluation of the history of a marijuana withdrawal syndrome in a large population. *Addiction* 1996;91(10):1469–1478.
